# Supplementary figures and images for: Exercise for the Diabetic Gut—Potential Health Effects and Underlying Mechanisms
Source: MDPI journal article supplement (doi:10.3390/nu14040813), 2022-02-15

Supplemental Material Figure S1. Overview of bacterial taxa. Modified according to [67].

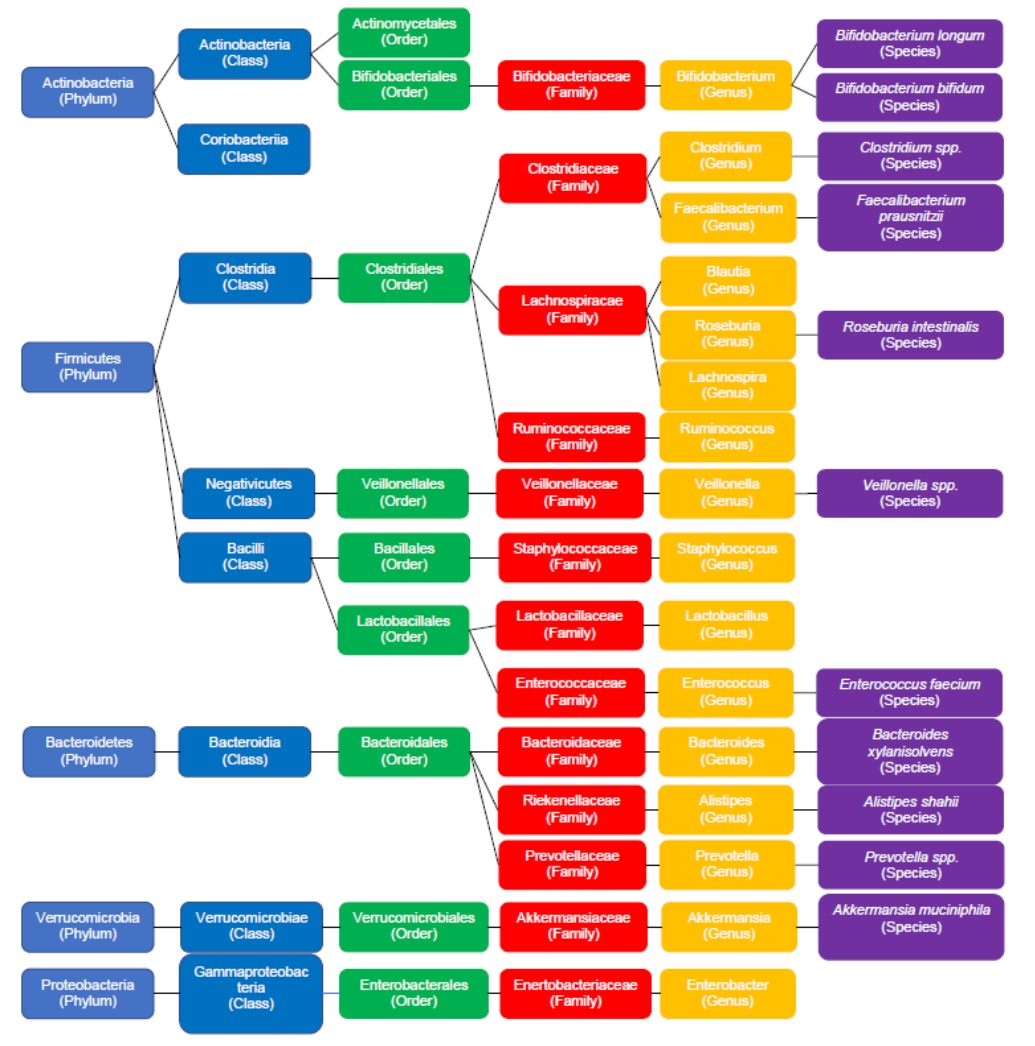

Supplement: s1 [file s1]
